# Supplementary material for: Comparative Genomics Analysis of Keratin-Degrading Chryseobacterium Species Reveals Their Keratinolytic Potential for Secondary Metabolite Production
Source: MDPI journal article supplement (doi:10.3390/microorganisms9051042), 2021-05-12
Supplement: s1 [file s1]

## ***Supplementary Materials***

Comparative genomics analysis of keratin-degrading *Chryseobacterium* species reveals their keratinolytic potential for secondary metabolite production

Dingrong Kang <sup>1,2,3,4,5,\*</sup>, Saeed Shoaie <sup>4,7</sup>, Samuel Jacquiod <sup>6</sup>, Søren J. Sørensen <sup>1</sup> and Rodrigo Ledesma-Amaro <sup>2,3,\*</sup>

<sup>1</sup>Section of Microbiology, Department of Biology, University of Copenhagen, 2100 Copenhagen, Denmark; sjs@bio.ku.dk

<sup>2</sup>Imperial College Centre for Synthetic Biology, Imperial College London, London SW7 2AZ, UK

<sup>3</sup>Department of Bioengineering, Imperial College London, London SW7 2AZ, UK

<sup>4</sup>Centre for Host-Microbiome Interactions, Faculty of Dentistry, Oral & Craniofacial Sciences, King's College London, London SE1 9RT, UK; saeed.shoaie@kcl.ac.uk

<sup>5</sup>TERRA Research and Teaching Centre, Microbial Processes and Interactions (MiPI), Gembloux Agro-Bio Tech, University of Liège, 5030 Gembloux, Belgium

<sup>6</sup>Agroécologie, AgroSup Dijon, INRAE, Université de Bourgogne Franche-Comté, F-21000 Dijon, France; samjqd@gmail.com

<sup>7</sup>Science for Life Laboratory, Department of Protein Science, KTH Royal Institute of Technology, 114 17 Stockholm, Sweden

\*Correspondence: r.ledesma-amaro@imperial.ac.uk (R.L.A.); dingrong.kang@hotmail.com (D.K.)

**Figure S1-S5, Table S1-S7.**

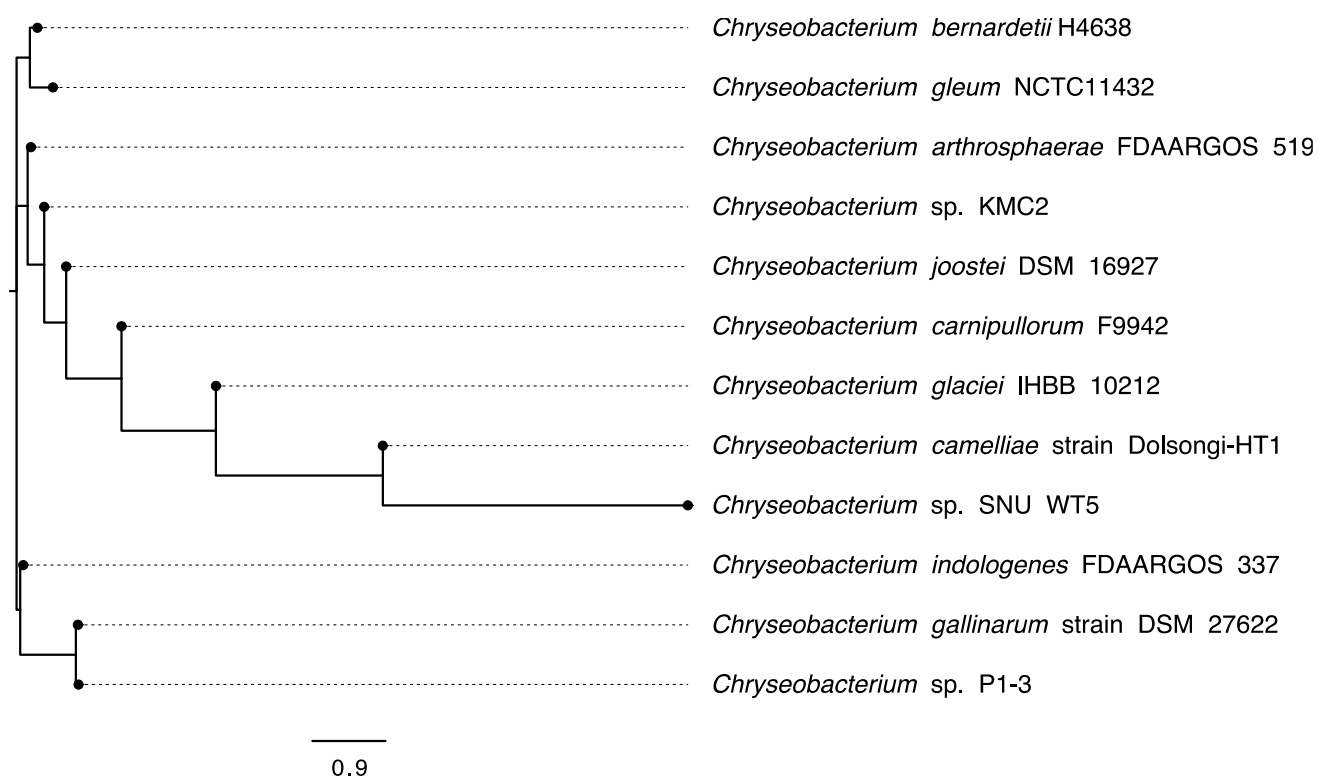

**Figure S1.** Phylogenetic tree of 12 *Chryseobacterium* genomes based on gene presence-absence patterns. Branch length represents gene gain/lose rates.

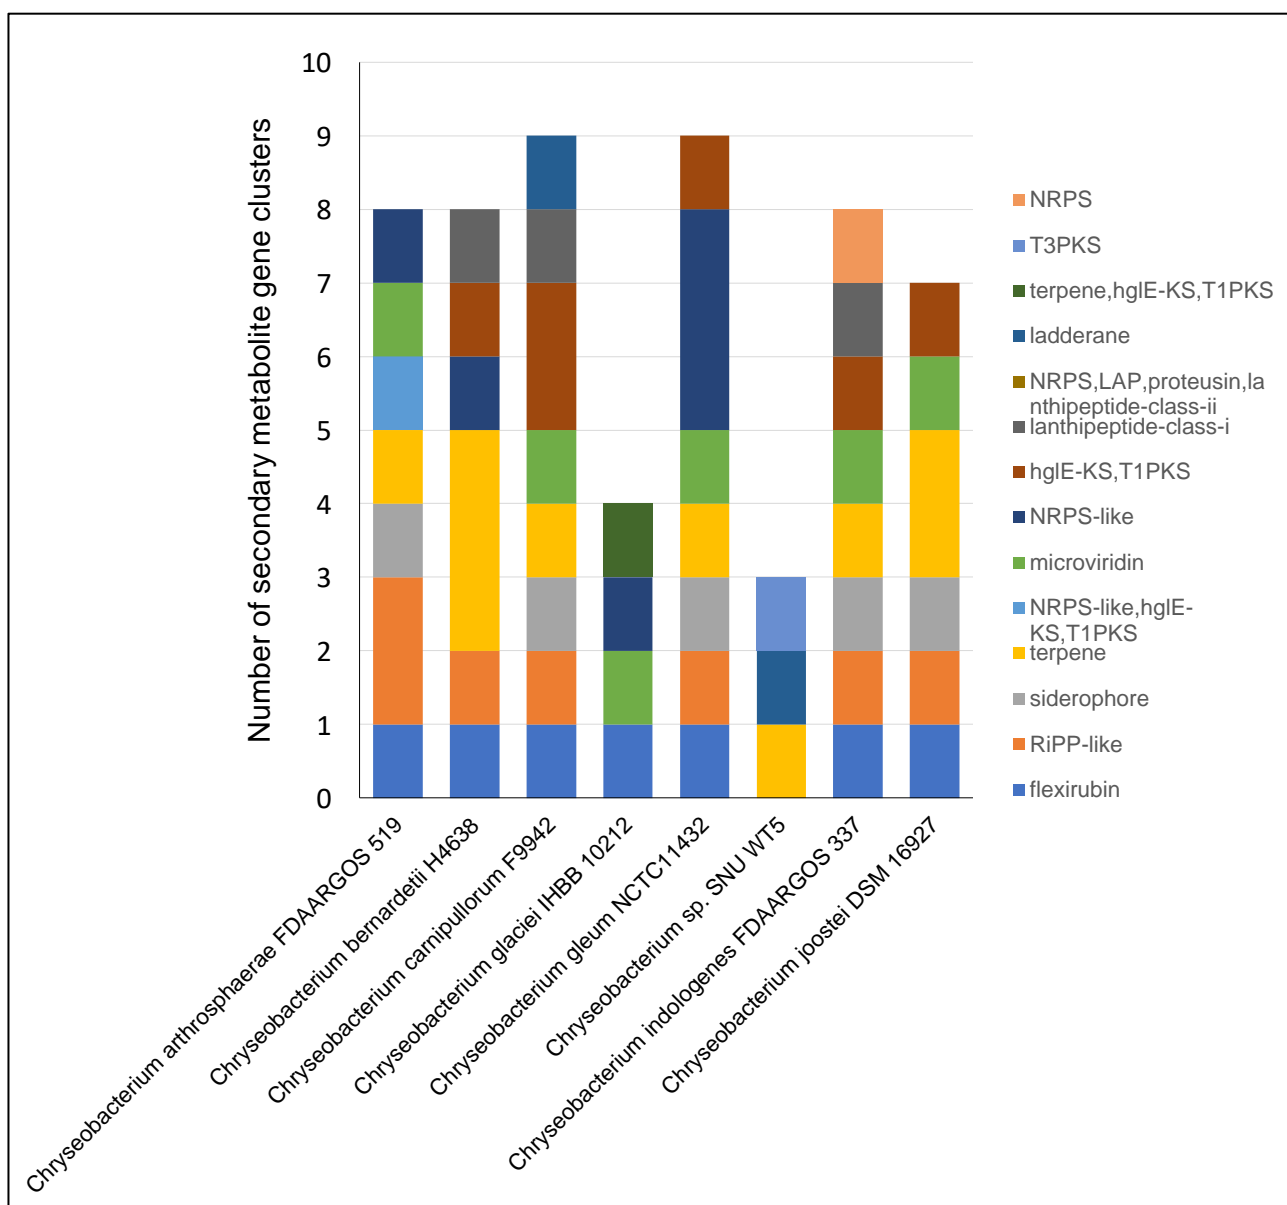

**Figure S2.** Composition of secondary metabolite gene clusters from eight *Chryseobacterium* genomes.

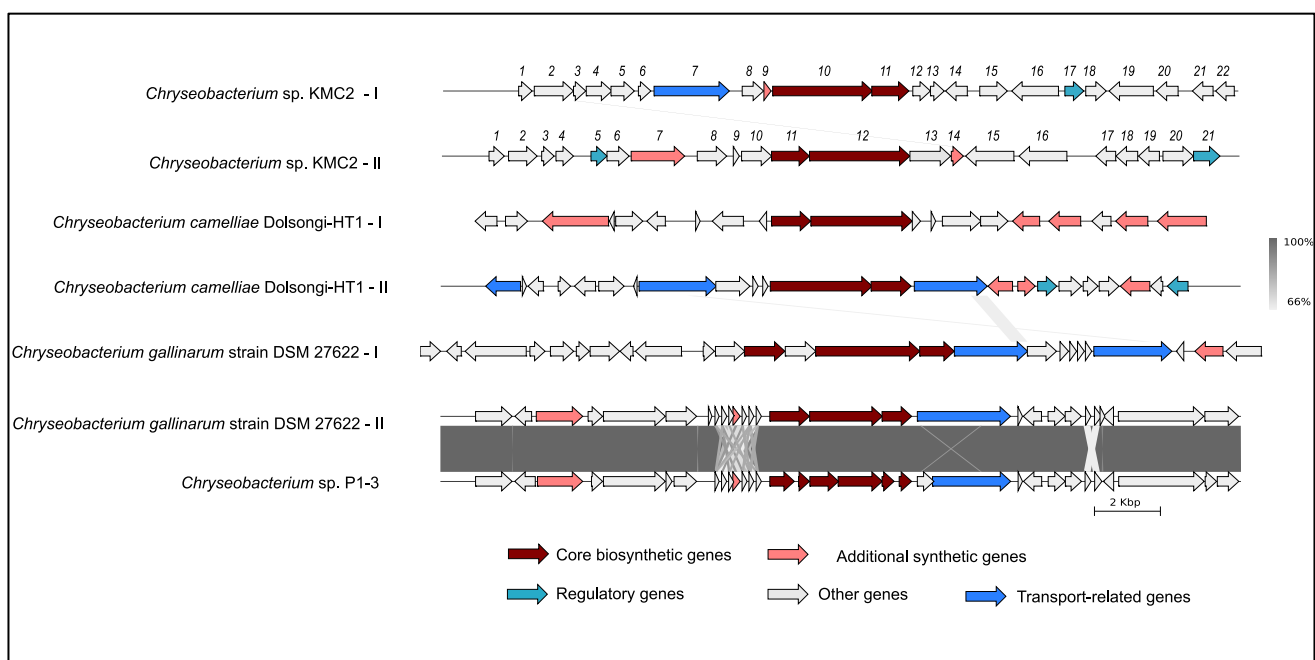

**Figure S3.** Lanthipeptide gene cluster from four *Chryseobacterium* genomes (Two gene clusters were predicted to synthesize the same secondary metabolite showing as “I” and “II”, respectively). The detailed description of each gene can be found in Table S4&5.

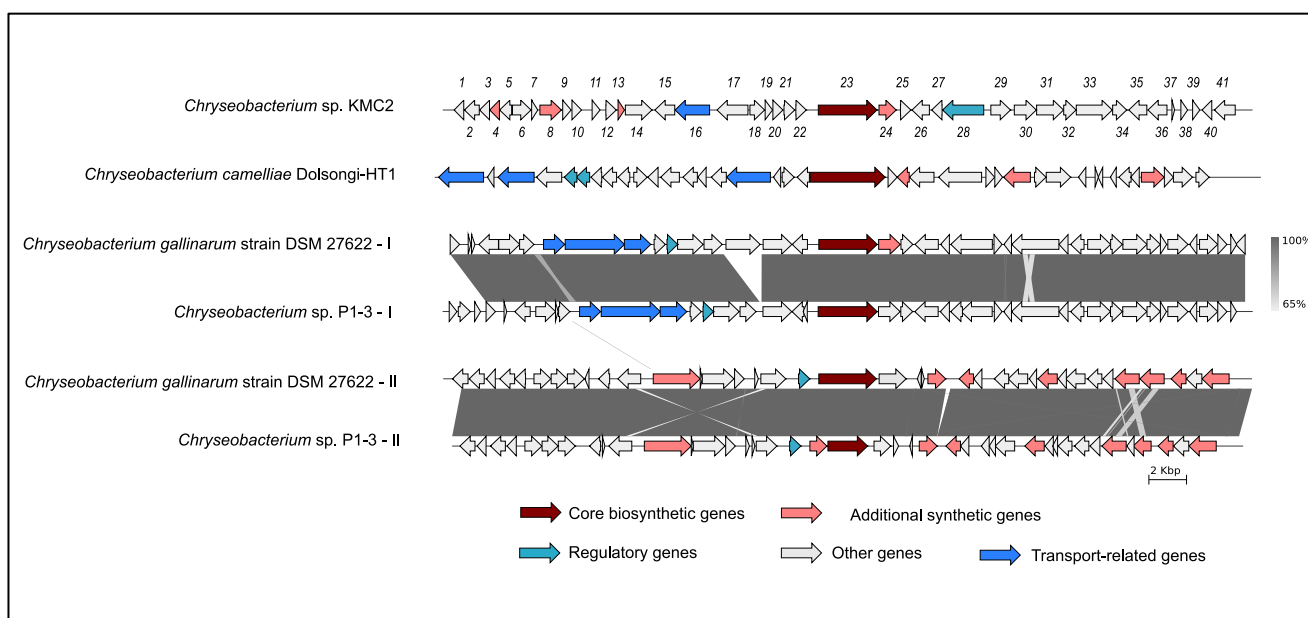

**Figure S4.** NRPS-like gene cluster from four *Chryseobacterium* genomes (Two gene clusters were predicted to synthesize the same secondary metabolite showing as “I” and “II”, respectively). The detailed description of each gene can be found in Table S6.

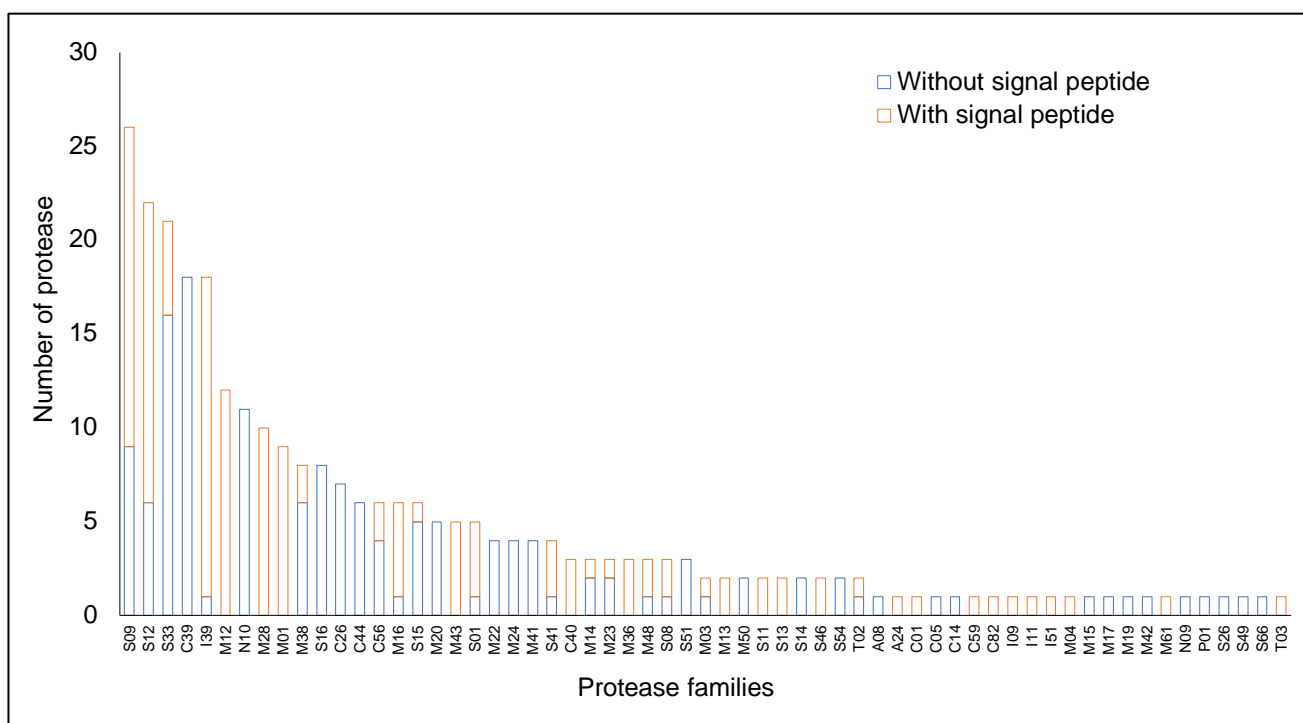

**Figure S5.** Protease families predicted from *Chryseobacterium* sp. KMC2 genome.

**Table S1.** The description of flexirubin-type pigment biosynthesis related gene cluster from *Chryseobacterium* sp. KMC2.

| Genes         | Length (bp) | Functional annotation (Sequence ID from NCBI BLASTP)               | Reference in genome |
|---------------|-------------|--------------------------------------------------------------------|---------------------|
| <i>flex1</i>  | 876         | Polysaccharide export protein                                      | KOACACPH_03512      |
| <i>flex2</i>  | 1119        | Decaprenyl-phosphate N-acetylglucosaminophosphotransferase         | KOACACPH_03513      |
| <i>flex3</i>  | 1002        | Undecaprenyl-phosphate 4-deoxy-4-formamido-L-arabinose transferase | KOACACPH_03514      |
| <i>flex4</i>  | 1071        | Formimidoylglutamase                                               | KOACACPH_03515      |
| <i>flex5</i>  | 2580        | DNA topoisomerase I                                                | KOACACPH_03516      |
| <i>flex6</i>  | 3447        | T9SS C-terminal target domain-containing protein (REC74243.1)      | KOACACPH_03517      |
| <i>flex7</i>  | 1140        | EpsG family protein (SMC94123.1)                                   | KOACACPH_03518      |
| <i>flex8</i>  | 1011        | hypothetical protein                                               | KOACACPH_03519      |
| <i>flex9</i>  | 3654        | MMPL family transporter (WP_047492502.1)                           | KOACACPH_03520      |
| <i>flex10</i> | 915         | Dialkylrecorsinol condensing enzyme DarA (WP_123858105.1)          | KOACACPH_03521      |
| <i>flex11</i> | 1140        | 3-oxoacyl-(acyl carrier protein) synthase III                      | KOACACPH_03522      |
| <i>flex12</i> | 432         | hypothetical protein                                               | KOACACPH_03523      |
| <i>flex13</i> | 444         | ABC transporter permease (WP_090026350.1)                          | KOACACPH_03524      |
| <i>flex14</i> | 237         | hypothetical protein                                               | KOACACPH_03525      |
| <i>flex15</i> | 2913        | Insulinase family protein (WP_084087117.1)                         | KOACACPH_03526      |
| <i>flex16</i> | 405         | hypothetical protein                                               | KOACACPH_03527      |
| <i>flex17</i> | 996         | BtrH N-terminal domain-containing protein (WP_047492484.1)         | KOACACPH_03528      |
| <i>flex18</i> | 759         | ABC transporter ATP-binding protein                                | KOACACPH_03529      |
| <i>flex19</i> | 1269        | ABC-2 type transporter                                             | KOACACPH_03530      |
| <i>flex20</i> | 429         | Putative esterase                                                  | KOACACPH_03531      |
| <i>flex21</i> | 1134        | Beta-ketoacyl synthase                                             | KOACACPH_03532      |
| <i>flex22</i> | 543         | 3-oxoacyl-ACP synthase (WP_081989140.1)                            | KOACACPH_03533      |
| <i>flex23</i> | 258         | Acyl carrier protein (WP_047492465.1)                              | KOACACPH_03534      |
| <i>flex24</i> | 1236        | Beta-ketoacyl synthase                                             | KOACACPH_03535      |
| <i>flex25</i> | 1062        | Beta-ketoacyl synthase chain length factor (WP_047492459.1)        | KOACACPH_03536      |
| <i>flex26</i> | 756         | Peptidoglycan-N-acetylglucosamine deacetylase                      | KOACACPH_03537      |
| <i>flex27</i> | 627         | Outer-membrane lipoprotein carrier protein                         | KOACACPH_03538      |
| <i>flex28</i> | 642         | hypothetical protein                                               | KOACACPH_03539      |
| <i>flex29</i> | 597         | PorT family protein (WP_052188704.1)                               | KOACACPH_03540      |
| <i>flex30</i> | 381         | 3-hydroxyacyl-ACP dehydratase (WP_081989131.1)                     | KOACACPH_03541      |
| <i>flex31</i> | 477         | hypothetical protein                                               | KOACACPH_03542      |
| <i>flex32</i> | 1170        | Undecaprenyl-phosphate 4-deoxy-4-formamido-L-arabinose transferase | KOACACPH_03543      |
| <i>flex33</i> | 2634        | T9SS-dependent M36 family metalloproteinase (WP_123321112.1)       | KOACACPH_03544      |

|               |      |                                                                      |                |
|---------------|------|----------------------------------------------------------------------|----------------|
| <i>flex34</i> | 2643 | T9SS-dependent M36 family metallopeptidase (WP_115919297.1)          | KOACACPH_03545 |
| <i>flex35</i> | 366  | hypothetical protein                                                 | KOACACPH_03546 |
| <i>flex36</i> | 1686 | Acyl-CoA--6-aminopenicillanic acid acyl-transferase (WP_115919299.1) | KOACACPH_03547 |
| <i>flex37</i> | 1518 | NAD(P)/FAD-dependent oxidoreductase (WP_115919301.1)                 | KOACACPH_03548 |
| <i>flex38</i> | 885  | Lipid A biosynthesis acyltransferase (WP_047492440.1)                | KOACACPH_03549 |
| <i>flex39</i> | 255  | Acyl carrier protein                                                 | KOACACPH_03550 |
| <i>flex40</i> | 1221 | Beta-ketoacyl synthase                                               | KOACACPH_03551 |
| <i>flex41</i> | 732  | 3-oxoacyl-[acyl-carrier-protein] reductase FabG                      | KOACACPH_03552 |
| <i>flex42</i> | 1521 | Tyrosine 2,3-aminomutase                                             | KOACACPH_03553 |
| <i>flex43</i> | 1257 | Tryptophan 7-halogenase (WP_084087087.1)                             | KOACACPH_03554 |
| <i>flex44</i> | 609  | hypothetical protein                                                 | KOACACPH_03555 |
| <i>flex45</i> | 1293 | Phenylacetate-coenzyme A ligase                                      | KOACACPH_03556 |
| <i>flex46</i> | 1689 | M23 family metallopeptidase (WP_047492411.1)                         | KOACACPH_03557 |
| <i>flex47</i> | 3396 | Isoleucine--tRNA ligase                                              | KOACACPH_03558 |
| <i>flex48</i> | 381  | RNA polymerase-binding transcription factor DksA                     | KOACACPH_03559 |
| <i>flex49</i> | 246  | Rhomboid family protein (WP_076356891.1)                             | KOACACPH_03560 |
| <i>flex50</i> | 195  | hypothetical protein                                                 | KOACACPH_03561 |
| <i>flex51</i> | 639  | Lipoprotein signal peptidase                                         | KOACACPH_03562 |
| <i>flex52</i> | 645  | YdcF family protein (WP_047492396.1)                                 | KOACACPH_03563 |
| <i>flex53</i> | 969  | Tryptophan--tRNA ligase                                              | KOACACPH_03564 |
| <i>flex54</i> | 1284 | Sensor histidine kinase                                              | KOACACPH_03565 |
| <i>flex55</i> | 672  | Phosphate regulon transcriptional regulatory protein PhoB            | KOACACPH_03566 |
| <i>flex56</i> | 249  | hypothetical protein                                                 | KOACACPH_03567 |
| <i>flex57</i> | 450  | PepSY-like domain-containing protein (WP_034692507.1)                | KOACACPH_03568 |
| <i>flex58</i> | 696  | Pyrimidine 5'-nucleotidase YjjG                                      | KOACACPH_03569 |
| <i>flex59</i> | 135  | hypothetical protein                                                 | KOACACPH_03570 |
| <i>flex60</i> | 591  | RNA polymerase sigma-H factor                                        | KOACACPH_03571 |
| <i>flex61</i> | 492  | hypothetical protein                                                 | KOACACPH_03572 |

---



**Table S2.** The description of microviridin biosynthesis related gene cluster from *Chryseobacterium* sp. KMC2.

| <b>Genes</b> | <b>Length (bp)</b> | <b>Functional annotation (Sequence ID from NCBI BLASTP)</b>         | <b>Reference in genome</b> |
|--------------|--------------------|---------------------------------------------------------------------|----------------------------|
| <i>mdnC</i>  | 384                | Putative acyl-CoA thioester hydrolase                               | KOACACPH_03650             |
| <i>mdnD</i>  | 798                | hypothetical protein                                                | KOACACPH_03651             |
| <i>mdnE</i>  | 2148               | Endonuclease MutS2                                                  | KOACACPH_03652             |
| <i>mdnF</i>  | 510                | GNAT family N-acetyltransferase (WP_084086267.1)                    | KOACACPH_03653             |
| <i>mdnG</i>  | 642                | Uracil-DNA glycosylase                                              | KOACACPH_03654             |
| <i>mdnH</i>  | 504                | hypothetical protein                                                | KOACACPH_03655             |
| <i>mdnI</i>  | 543                | DUF456 domain-containing protein (WP_047487323.1)                   | KOACACPH_03656             |
| <i>mdnJ</i>  | 1269               | Transporter, small conductance mechanosensitive                     | KOACACPH_03657             |
| <i>mdnK</i>  | 720                | Pyridoxine 5'-phosphate synthase                                    | KOACACPH_03658             |
| <i>mdnL</i>  | 780                | Esterase YbfF                                                       | KOACACPH_03659             |
| <i>mdnA</i>  | 240                | Microviridin (WP_084086262.1)                                       | KOACACPH_03660             |
| <i>mdnB</i>  | 219                | Microviridin (WP_047487341.1)                                       | KOACACPH_03661             |
| <i>mdnM</i>  | 957                | MvdC family ATP-grasp ribosomal peptide maturase (WP_084086261.1)   | KOACACPH_03662             |
| <i>mdnN</i>  | 1005               | MvdD family ATP-grasp ribosomal peptide maturase (WP_084086260.1)   | KOACACPH_03663             |
| <i>mdnO</i>  | 1014               | NAD-dependent epimerase/dehydratase family protein (WP_047487349.1) | KOACACPH_03664             |
| <i>mdnP</i>  | 1770               | Long-chain-fatty-acid--CoA ligase FadD15                            | KOACACPH_03665             |
| <i>mdnQ</i>  | 1059               | Diphosphomevalonate decarboxylase (WP_084086257.1)                  | KOACACPH_03666             |
| <i>mdnR</i>  | 942                | Endonuclease (WP_084086256.1)                                       | KOACACPH_03667             |
| <i>mdnS</i>  | 444                | Nuclear transport factor 2 family protein (WP_084086255.1)          | KOACACPH_03668             |
| <i>mdnT</i>  | 384                | VOC family protein (WP_047487892.1)                                 | KOACACPH_03669             |
| <i>mdnU</i>  | 384                | DUF1634 domain-containing protein (WP_047487366.1)                  | KOACACPH_03670             |
| <i>mdnV</i>  | 831                | Sulfite exporter TauE/SafE family protein (WP_047487368.1)          | KOACACPH_03671             |

**Table S3.** The description of siderophore biosynthesis related gene cluster from *Chryseobacterium* sp. KMC2.

| Genes       | Length (bp) | Functional annotation (Sequence ID from NCBI BLASTP)               | Reference in genome |
|-------------|-------------|--------------------------------------------------------------------|---------------------|
| <i>speC</i> | 576         | Crp/Fnr family transcriptional regulator (WP_084084255.1)          | KOACACPH_01784      |
| <i>speD</i> | 810         | Esterase family protein (WP_115917879.1)                           | KOACACPH_01785      |
| <i>speE</i> | 1098        | L-lysine 4-hydroxylase                                             | KOACACPH_01786      |
| <i>speF</i> | 1512        | L-2,4-diaminobutyrate decarboxylase                                | KOACACPH_01787      |
| <i>speA</i> | 2409        | Putative siderophore biosynthesis protein                          | KOACACPH_01788      |
| <i>speH</i> | 1317        | L-lysine N6-monooxygenase                                          | KOACACPH_01789      |
| <i>speB</i> | 1809        | IucA/IucC family siderophore biosynthesis protein (WP_047496558.1) | KOACACPH_01790      |
| <i>speI</i> | 1404        | MATE efflux family protein                                         | KOACACPH_01791      |
| <i>speJ</i> | 246         | Acyl carrier protein (WP_084084248.1)                              | KOACACPH_01792      |
| <i>speK</i> | 1389        | 2-succinylbenzoate--CoA ligase                                     | KOACACPH_01793      |

**Table S4.** The description of lanthipeptide I biosynthesis related gene cluster from *Chryseobacterium* sp. KMC2.

| Genes        | Length (bp) | Functional annotation (Sequence ID from NCBI BLASTP) | Reference in genome |
|--------------|-------------|------------------------------------------------------|---------------------|
| <i>lan1</i>  | 408         | hypothetical protein                                 | KOACACPH_00404      |
| <i>lan2</i>  | 1191        | Alanine dehydrogenase                                | KOACACPH_00405      |
| <i>lan3</i>  | 372         | hypothetical protein                                 | KOACACPH_00406      |
| <i>lan4</i>  | 774         | Histidine kinase (WP_084086149.1)                    | KOACACPH_00407      |
| <i>lan5</i>  | 711         | Transcriptional regulatory protein NatR              | KOACACPH_00408      |
| <i>lan6</i>  | 378         | hypothetical protein                                 | KOACACPH_00409      |
| <i>lan7</i>  | 2289        | Sodium/hydrogen exchanger                            | KOACACPH_00410      |
| <i>lan8</i>  | 654         | hypothetical protein                                 | KOACACPH_00411      |
| <i>lan9</i>  | 222         | Class I lanthipeptide (WP_047487795.1)               | KOACACPH_00412      |
| <i>lan10</i> | 3036        | Lantibiotic dehydratase domain protein               | KOACACPH_00413      |
| <i>lan11</i> | 1128        | Lanthionine synthetase C family protein              | KOACACPH_00414      |
| <i>lan12</i> | 540         | hypothetical protein                                 | KOACACPH_00415      |
| <i>lan13</i> | 417         | hypothetical protein                                 | KOACACPH_00416      |
| <i>lan14</i> | 663         | hypothetical protein                                 | KOACACPH_00417      |
| <i>lan15</i> | 843         | Cyclohexadienyl dehydrogenase                        | KOACACPH_00418      |
| <i>lan16</i> | 1419        | L-serine dehydratase 2                               | KOACACPH_00419      |
| <i>lan17</i> | 579         | Transcription regulator, crp                         | KOACACPH_00420      |
| <i>lan18</i> | 624         | FMN-dependent NADH-azoreductase 1                    | KOACACPH_00421      |
| <i>lan19</i> | 1344        | Ammonia channel                                      | KOACACPH_00422      |
| <i>lan20</i> | 666         | Alpha/beta hydrolase (WP_115918317.1)                | KOACACPH_00423      |
| <i>lan21</i> | 630         | Protein YceI                                         | KOACACPH_00424      |
| <i>lan22</i> | 567         | Protein YceI                                         | KOACACPH_00425      |

**Table S5.** The description of lanthipeptide II biosynthesis related gene cluster from *Chryseobacterium* sp. KMC2.

| Genes        | Length (bp) | Functional annotation (Sequence ID from NCBI BLASTP)                        | Reference in   |
|--------------|-------------|-----------------------------------------------------------------------------|----------------|
| <i>lan1</i>  | 804         | HTH-type transcriptional activator RhaR                                     | KOACACPH_02362 |
| <i>lan2</i>  | 927         | Transcriptional regulator (WP_084085280.1)                                  | KOACACPH_02363 |
| <i>lan3</i>  | 636         | hypothetical protein                                                        | KOACACPH_02364 |
| <i>lan4</i>  | 660         | hypothetical protein                                                        | KOACACPH_02365 |
| <i>lan5</i>  | 600         | CDP-alcohol phosphatidyltransferase family protein (WP_115917644.1)         | KOACACPH_02366 |
| <i>lan6</i>  | 1449        | Asparagine--tRNA ligase                                                     | KOACACPH_02367 |
| <i>lan7</i>  | 1464        | RNA polymerase sigma-54 factor                                              | KOACACPH_02368 |
| <i>lan8</i>  | 369         | hypothetical protein                                                        | KOACACPH_02369 |
| <i>lan9</i>  | 1236        | hypothetical protein                                                        | KOACACPH_02370 |
| <i>lan10</i> | 3051        | Lantibiotic dehydratase domain protein                                      | KOACACPH_02371 |
| <i>lan11</i> | 1158        | Lanthionine synthetase C family protein                                     | KOACACPH_02372 |
| <i>lan12</i> | 918         | LLM class flavin-dependent oxidoreductase (WP_084085264.1)                  | KOACACPH_02373 |
| <i>lan13</i> | 186         | Class I lanthipeptide (WP_047488251.1)                                      | KOACACPH_02374 |
| <i>lan14</i> | 891         | Carboxypeptidase-like regulatory domain-containing protein (WP_084085262.1) | KOACACPH_02375 |
| <i>lan15</i> | 1626        | 3-[(3aS,4S,7aS)-7a-methyl-1,5-dioxo-octahydro-1H-inden-4-yl]propanoyl:CoA   | KOACACPH_02376 |
| <i>lan16</i> | 675         | Beta-carotene 15,15'-monooxygenase (WP_123942665.1)                         | KOACACPH_02377 |
| <i>lan17</i> | 492         | Sigma-70 family RNA polymerase sigma factor (WP_027374652.1)                | KOACACPH_02378 |
| <i>lan18</i> | 531         | hypothetical protein                                                        | KOACACPH_02379 |
| <i>lan19</i> | 378         | hypothetical protein                                                        | KOACACPH_02380 |
| <i>lan20</i> | 870         | Polyphosphate:ADP phosphotransferase                                        | KOACACPH_02381 |
| <i>lan21</i> | 465         | DUF1573 domain-containing protein (WP_047488266.1)                          | KOACACPH_02382 |

**Table S6.** The description of NRPS-like biosynthesis related gene cluster from *Chryseobacterium* sp. KMC2.

| <b>Genes</b>   | <b>Length (bp)</b> | <b>Functional annotation (Sequence ID from NCBI BLASTP)</b>            | <b>Reference in</b> |
|----------------|--------------------|------------------------------------------------------------------------|---------------------|
| <i>nrpsl1</i>  | 1110               | DUF1624 domain-containing protein (WP_052188696.1)                     | KOACACPH_01527      |
| <i>nrpsl2</i>  | 519                | Thioredoxin family protein (WP_047492101.1)                            | KOACACPH_01528      |
| <i>nrpsl3</i>  | 396                | hypothetical protein                                                   | KOACACPH_01529      |
| <i>nrpsl4</i>  | 357                | hypothetical protein                                                   | KOACACPH_01530      |
| <i>nrpsl5</i>  | 144                | hypothetical protein                                                   | KOACACPH_01532      |
| <i>nrpsl6</i>  | 1014               | Nucleoid-associated protein (WP_047492108.1)                           | KOACACPH_01533      |
| <i>nrpsl7</i>  | 960                | hypothetical protein                                                   | KOACACPH_01534      |
| <i>nrpsl8</i>  | 750                | Fumarate reductase iron-sulfur subunit                                 | KOACACPH_01535      |
| <i>nrpsl9</i>  | 1917               | Fumarate reductase flavoprotein subunit                                | KOACACPH_01536      |
| <i>nrpsl10</i> | 657                | Succinate dehydrogenase cytochrome b subunit (WP_047492118.1)          | KOACACPH_01537      |
| <i>nrpsl11</i> | 1431               | Putative malate transporter YflS                                       | KOACACPH_01538      |
| <i>nrpsl12</i> | 1164               | Porin (WP_084085123.1)                                                 | KOACACPH_01539      |
| <i>nrpsl13</i> | 1050               | Linear amide C-N hydrolase (WP_047492125.1)                            | KOACACPH_01540      |
| <i>nrpsl14</i> | 2193               | Sensor histidine kinase                                                | KOACACPH_01541      |
| <i>nrpsl15</i> | 552                | Biliverdin-producing heme oxygenase (WP_047492131.1)                   | KOACACPH_01542      |
| <i>nrpsl16</i> | 927                | Malate dehydrogenase                                                   | KOACACPH_01543      |
| <i>nrpsl17</i> | 555                | hypothetical protein                                                   | KOACACPH_01544      |
| <i>nrpsl18</i> | 918                | Proline iminopeptidase                                                 | KOACACPH_01545      |
| <i>nrpsl19</i> | 3117               | Linear gramicidin synthase subunit D                                   | KOACACPH_01546      |
| <i>nrpsl20</i> | 555                | Putative glycolipid-binding domain-containing protein (WP_157969889.1) | KOACACPH_01548      |
| <i>nrpsl21</i> | 573                | Crp/Fnr family transcriptional regulator (WP_047492147.1)              | KOACACPH_01549      |
| <i>nrpsl22</i> | 537                | GNAT family N-acetyltransferase (WP_047492150.1)                       | KOACACPH_01550      |
| <i>nrpsl23</i> | 393                | AMP-dependent synthetase and ligase                                    | KOACACPH_01551      |
| <i>nrpsl24</i> | 786                | hypothetical protein                                                   | KOACACPH_01552      |
| <i>nrpsl25</i> | 1647               | Alkaline phosphatase PafA                                              | KOACACPH_01553      |
| <i>nrpsl26</i> | 1842               | Vitamin B12 transporter BtuB                                           | KOACACPH_01554      |
| <i>nrpsl27</i> | 1059               | hypothetical protein                                                   | KOACACPH_01555      |
| <i>nrpsl28</i> | 1419               | CCA-adding enzyme                                                      | KOACACPH_01556      |
| <i>nrpsl29</i> | 348                | Nuclear transport factor 2 family protein (WP_047492172.1)             | KOACACPH_01557      |
| <i>nrpsl30</i> | 549                | Threonylcarbamoyl-AMP synthase                                         | KOACACPH_01558      |
| <i>nrpsl31</i> | 483                | IS200/IS605 family transposase (WP_115918710.1)                        | KOACACPH_01559      |
| <i>nrpsl32</i> | 513                | DinB family protein (WP_047492181.1)                                   | KOACACPH_01560      |

|                |      |                                                  |                |
|----------------|------|--------------------------------------------------|----------------|
| <i>nrpsl33</i> | 447  | GNAT family N-acetyltransferase (WP_047492184.1) | KOACACPH_01561 |
| <i>nrpsl34</i> | 1140 | Cystathionine beta-lyase                         | KOACACPH_01562 |
| <i>nrpsl35</i> | 324  | Gliding motility protein GldC (WP_047492191.1)   | KOACACPH_01563 |
| <i>nrpsl36</i> | 984  | Gliding motility protein GldB (WP_081989115.1)   | KOACACPH_01564 |
| <i>nrpsl37</i> | 639  | Internalin J                                     | KOACACPH_01565 |
| <i>nrpsl38</i> | 522  | Acetyltransferase                                | KOACACPH_01566 |
| <i>nrpsl39</i> | 531  | N-acetyltransferase (WP_115918805.1)             | KOACACPH_01567 |
| <i>nrpsl40</i> | 792  | NH(3)-dependent NAD(+) synthetase                | KOACACPH_01568 |
| <i>nrpsl41</i> | 516  | Ribonuclease                                     | KOACACPH_01569 |

---

**Table S7.** The description of genes and metabolic pathways related to keratin utilization in *Chryseobacterium* sp. KMC2 genome.

| Gene order | EC number | KO number              | Functional annotation                                      | Metabolic pathway                    | Reference in genome                                         |
|------------|-----------|------------------------|------------------------------------------------------------|--------------------------------------|-------------------------------------------------------------|
| 1          | 2.6.1.42  | K00826                 | Branched-chain-amino-acid aminotransferase                 | Metabolism of Leucine and Isoleucine | KOACACPH_00391/KOACACPH_04122                               |
| 2          | 1.2.4.4   | K11381                 | 3-methyl-2-oxobutanoate dehydrogenase                      | Metabolism of Leucine and Isoleucine | KOACACPH_00351                                              |
| 3          | 2.3.1.168 | K09699                 | Dihydrolipoyllysine-residue (2-methylpropanoyl)transferase | Metabolism of Leucine and Isoleucine | KOACACPH_03134                                              |
| 4          | 1.3.8.7   | K00248, K00249         | Acyl-CoA dehydrogenase                                     | Metabolism of Leucine and Isoleucine | KOACACPH_01887                                              |
| 5          | 4.2.1.18  | K13766                 | Methylglutaconyl-CoA hydratase                             | Metabolism of Leucine and Isoleucine | KOACACPH_03720                                              |
| 6          | 4.1.3.4   | K01640                 | Hydroxymethylglutaryl-CoA lyase                            | Metabolism of Leucine and Isoleucine | KOACACPH_03960                                              |
| 7          | 1.3.8.1   | K00248                 | Acyl-CoA dehydrogenase                                     | Metabolism of Leucine and Isoleucine | KOACACPH_00342/KOACACPH_03381                               |
| 8          | 4.2.1.17  | K01715, K01692         | Enoyl-CoA hydratase                                        | Metabolism of Leucine and Isoleucine | KOACACPH_03576/KOACACPH_01888/KOACACPH_01890                |
| 9          | 1.1.1.35  | K01782, K07516         | 3-hydroxyacyl-CoA dehydrogenase                            | Metabolism of Leucine and Isoleucine | KOACACPH_03378                                              |
| 10         | 2.3.1.16  | K00623                 | Acetyl-CoA acyltransferase                                 | Metabolism of Leucine and Isoleucine | KOACACPH_03380                                              |
| 11         | 2.3.3.1   | K01647                 | Citrate synthase                                           | TCA cycle                            | KOACACPH_01094/KOACACPH_01792                               |
| 12         | 4.2.1.3   | K01681                 | Aconitase                                                  | TCA cycle                            | KOACACPH_03590                                              |
| 13         | 1.1.1.42  | K00031                 | Isocitrate dehydrogenase                                   | TCA cycle                            | KOACACPH_00544                                              |
| 14         | 1.2.4.2   | K00164, K01616         | Oxoglutarate dehydrogenase                                 | TCA cycle                            | KOACACPH_00825                                              |
| 15         | 2.3.1.61  | K00658                 | Dihydrolipoyl succinyltransferase                          | TCA cycle                            | KOACACPH_00826                                              |
| 16         | 1.8.1.4   | K00382                 | Dihydrolipoyl dehydrogenase                                | TCA cycle                            | KOACACPH_00132/KOACACPH_00765                               |
| 17         | 6.2.1.5   | K01902, K01903, K02381 | Succinate-CoA ligase                                       | TCA cycle                            | KOACACPH_01458/KOACACPH_03423                               |
| 18         | 2.8.3.18  | K01067, K18118         | Succinyl-CoA:acetate CoA-transferase                       | TCA cycle                            | KOACACPH_02425                                              |
| 19         | 1.3.5.1   | K00240                 | Succinate dehydrogenase                                    | TCA cycle                            | KOACACPH_01535/KOACACPH_01536/KOACACPH_02931/KOACACPH_02932 |

|    |           |                                |                                                             |                                       |                               |
|----|-----------|--------------------------------|-------------------------------------------------------------|---------------------------------------|-------------------------------|
| 20 | 4.2.1.2   | K01676, K01677, K01678, K01679 | Fumarate hydratase                                          | TCA cycle                             | KOACACPH_02695/KOACACPH_02696 |
| 21 | 1.1.5.4   | K00116                         | Malate dehydrogenase (quinone)                              | TCA cycle                             | KOACACPH_02576                |
| 22 | 1.1.1.37  | K00024                         | Malate dehydrogenase                                        | TCA cycle                             | KOACACPH_01543                |
| 23 | 4.1.1.49  | K01610                         | Phosphoenolpyruvate carboxykinase (ATP)                     | Glycolysis/Gluconeogenesis            | KOACACPH_00978                |
| 24 | 4.2.1.11  | K01689                         | Phosphopyruvate hydratase                                   | Glycolysis/Gluconeogenesis            | KOACACPH_01093                |
| 25 | 5.4.2.11  | K01834                         | 2,3-bisphosphoglycerate-dependent phosphoglycerate mutase   | Glycolysis/Gluconeogenesis            | KOACACPH_01759                |
| 26 | 5.4.2.12  | K15633                         | 2,3-bisphosphoglycerate-independent phosphoglycerate mutase | Glycolysis/Gluconeogenesis            | KOACACPH_03235                |
| 27 | 2.7.2.3   | K00927                         | Phosphoglycerate kinase                                     | Glycolysis/Gluconeogenesis            | KOACACPH_03849                |
| 28 | 1.2.1.12  | K00134                         | Glyceraldehyde-3-phosphate dehydrogenase                    | Glycolysis/Gluconeogenesis            | KOACACPH_03436                |
| 29 | 1.2.1.9   | K00131                         | NADP-dependent glyceraldehyde-3-phosphate dehydrogenase     | Glycolysis/Gluconeogenesis            | KOACACPH_00524                |
| 30 | 4.1.2.13  | K01624                         | Fructose-bisphosphate aldolase                              | Glycolysis/Gluconeogenesis            | KOACACPH_03902/KOACACPH_04210 |
| 31 | 2.7.1.11  | K00850, K21071                 | 6-phosphofructokinase                                       | Glycolysis/Gluconeogenesis            | KOACACPH_03435                |
| 32 | 3.1.3.11  | K03841                         | Fructose-bisphosphatase                                     | Glycolysis/Gluconeogenesis            | KOACACPH_01662                |
| 33 | 5.4.2.2   | K01835                         | Phosphoglucomutase                                          | Glycolysis/Gluconeogenesis            | KOACACPH_03206                |
| 34 | 2.7.1.40  | K00873                         | Pyruvate kinase                                             | Pyruvate metabolism                   | KOACACPH_02949                |
| 35 | 1.2.4.1   | K00161, K00162                 | pyruvate dehydrogenase                                      | Pyruvate metabolism                   | KOACACPH_03262/KOACACPH_02307 |
| 36 | 2.3.3.5   | K01659                         | 2-methylcitrate synthase                                    | Propanoate metabolism                 | KOACACPH_01884                |
| 37 | 4.2.1.79  | K01720                         | 2-methylcitrate dehydratase                                 | Propanoate metabolism                 | KOACACPH_01885                |
| 38 | 4.2.1.99  | K01682                         | 2-methylaconitate hydratase                                 | Propanoate metabolism                 | KOACACPH_03589                |
| 39 | 1.2.4.4   | K11381                         | 3-methyl-2-oxobutanoate dehydrogenase                       | Propanoate metabolism                 | KOACACPH_00351                |
| 40 | 2.3.1.168 | K09699                         | Dihydrolipoyllysine-residue (2-methylpropanoyl)transferase  | Propanoate metabolism                 | KOACACPH_03134                |
| 41 | 4.1.3.30  | K03417                         | 2-methylisocitrate lyase                                    | Propanoate metabolism                 | KOACACPH_01883                |
| 42 | 2.5.1.6   | K00789                         | S-adenosylmethionine synthase                               | Metabolism of Methionine and Cysteine | KOACACPH_03573                |



|    |          |                |                                                        |                                                                |                               |
|----|----------|----------------|--------------------------------------------------------|----------------------------------------------------------------|-------------------------------|
| 43 | 2.1.1.37 | K00558         | DNA (cytosine-5-)-methyltransferase                    | Metabolism of Methionine and Cysteine                          | KOACACPH_02976                |
| 44 | 3.3.1.1  | K01251         | Adenosylhomocysteinase                                 | Metabolism of Methionine and Cysteine                          | KOACACPH_03683                |
| 45 | 4.2.1.22 | K01697         | Putative cystathionine beta-synthase                   | Metabolism of Methionine and Cysteine                          | KOACACPH_01627                |
| 46 | 4.4.1.1  | K01758         | L-methionine gamma-lyase                               | Metabolism of Methionine and Cysteine                          | KOACACPH_01562                |
| 47 | 2.6.1.1  | K00812         | Aspartate/prephenate aminotransferase                  | Metabolism of Phenylalanine, Tyrosine, Glutamate and Aspartate | KOACACPH_02216                |
| 48 | 4.3.1.1  | K01744         | Aspartate ammonia-lyase                                | Metabolism of Phenylalanine, Tyrosine, Glutamate and Aspartate | KOACACPH_04295                |
| 49 | 4.1.1.19 | K01585         | Biosynthetic arginine decarboxylase                    | Metabolism of Arginine                                         | KOACACPH_01491                |
| 50 | 3.5.3.11 | K01480         | Agmatinase                                             | Metabolism of Arginine                                         | KOACACPH_01493                |
| 51 | 2.5.1.16 | K00797         | Polyamine aminopropyltransferase                       | Metabolism of Arginine                                         | KOACACPH_01104                |
| 52 | 1.5.99.6 | K00316         | Spermidine dehydrogenase                               | Metabolism of Arginine                                         | KOACACPH_01105                |
| 53 | 1.2.1.3  | K00128         | Aldehyde dehydrogenase (NAD+)                          | Metabolism of Arginine                                         | KOACACPH_01832/KOACACPH_01990 |
| 54 | 2.6.1.19 | K07250, K13524 | 4-aminobutyrate aminotransferase                       | Metabolism of Arginine                                         | KOACACPH_03346                |
| 55 | 1.2.1.24 | K08324         | Succinate-semialdehyde dehydrogenase (NAD+)            | Metabolism of Arginine                                         | KOACACPH_02948                |
| 56 | 1.2.1.79 | K00135         | Succinate-semialdehyde dehydrogenase (NADP+)           | Metabolism of Arginine                                         | KOACACPH_02948                |
| 57 | 2.7.7.4  | K00955         | Sulfate adenylyltransferase                            | Sulfur metabolism                                              | KOACACPH_01861/KOACACPH_01862 |
| 58 | 2.7.1.25 | K00955         | Adenylyl-sulfate kinase                                | Sulfur metabolism                                              | KOACACPH_01862                |
| 59 | 1.8.4.8  | K00390         | Phosphoadenosine phosphosulfate reductase              | Sulfur metabolism                                              | KOACACPH_01860                |
| 60 | 1.8.1.2  | K00380         | Sulfite reductase (NADPH) flavoprotein alpha-component | Sulfur metabolism                                              | KOACACPH_01866                |
| 61 | 1.8.1.2  | K00381         | Sulfite reductase (NADPH) hemoprotein beta-component   | Sulfur metabolism                                              | KOACACPH_01867                |
| 62 | 1.8.7.1  | K00392         | Assimilatory sulfite reductase                         | Sulfur metabolism                                              | KOACACPH_01867                |

---
